# Supplementary material
Source: publisher figshare collection journal article supplement (https://tandf.figshare.com/ndownloader/files/21770949)
Supplement: Supplementary file 1 [file 21770949]

**SUPPLEMENTARY MATERIAL**

**Limiting resources on the reproductive success of a cavity-nesting bee species in a grassland agroecosystem**

Marina P. Rosanigo1, Hugo J. Marrero2, 3 & Juan P. Torretta1, 3

1 Universidad de Buenos Aires, Facultad de Agronomía, Cátedra de Botánica General, Av. San Martín 4453, C1417DSE, Buenos Aires, Argentina.

2 Centro de Recursos Naturales Renovables de las Zonas Semiáridas, Camino de la Carrindanga Km. 7, 8000 Bahía Blanca, Argentina.

3 Consejo Nacional de Investigaciones Cientíﬁcas y Técnicas (CONICET), Argentina

**GLMM-** Generalized linear mixed models

In the GLMMs, date (date of survey), diameter (trap hole diameter), site (identities of WAM) and bundles were used as nested random factors. The flower diversity (Shannon-Wiener Index), nesting sites availability (proportion of wood) and the distance to the WAM (inside or outside the WAM) were used as fixed factors. Interactions between fixed factors were included in the models when corresponded (model M7 and M8). Different response variables were used in the models: “nest” (proportion of traps occupied for a nest); “cell” (number of cells for nest); “reproductive success” (proportion of adults emerged for nest) and “parasitism” (proportion of cell parasite in a nest). We selected the best-fitting model through the lowest AIC (Akaike Information Criterion) when we compared M7 and M8.

Models to evaluate how floral resources and/or nesting resources are regulating the bee abundance

- M1. Nest ~ (1|date/ bundles) + (1|site/ bundles /diameter) +Flower diversity, family binomial
- M2. Nest ~ (1|date/ bundles) + (1|site/ bundles /diameter) + Nesting sites availability, family binomial
- M3. Cell ~ (1|date/ bundles) + (1|site/ bundles /diameter) +Flower diversity, family poisson
- M4. Cell ~ (1|date/ bundles) + (1|site/ bundles /diameter) + Nesting sites availability, family poisson

Models to evaluate how the position of nests in agricultural matrix and availability of resources impact on parasitism rate

- M5. Parasitism ~ (1|date/ bundles) + (1|site/ bundles /diameter) +Distance to WAM, family binomial
- M6. Parasitism ~ (1|date/ bundles) + (1|site/ bundles /diameter) + Flower diversity, family binomial

Models to evaluate how the position of nests in agricultural matrix and availability of resources impact on bee reproductive success

- M7. Reproductive success ~ (1|date/ bundles) + (1|site/ bundles /diameter) +Distance to WAM, family binomial
- M8. Reproductive success ~ (1|date/ bundles) + (1|site/ bundles /diameter) +Distance to WAM * Flower diversity, family binomial
- M9. Reproductive success ~ (1|date/ bundles) + (1|site/ bundles /diameter) +Distance to WAM * Nesting sites availability, family binomial

*Model selection*. Models M8 and M9 were compared through their AIC.

M8 (df= 9 and AIC= 1072.702), M9 (df= 9 and AIC= 1048.359).

**GLMM Output-** Output of the generalized linear mixed models used in the analysis to test the study predictions.

| Model M1 | Coefficient | SE | z value | p-value |
| --- | --- | --- | --- | --- |
| Intercept | -4.3364 | 0.7751 | -5.594 | <0.0001 |
| Flower diversity | 1.1399 | 0.6019 | 1.894 | 0.0583 |

| Model M2 | Coefficient | SE | z value | p-value |
| --- | --- | --- | --- | --- |
| Intercept | -3.57661 | 1.00591 | -3.556 | 0.000377 |
| Nesting sites availability | -0.02258 | 0.14346 | -0.157 | 0.874913 |

| Model M3 | Coefficient | SE | z value | p-value |
| --- | --- | --- | --- | --- |
| Intercept | -4.1301 | 0.7465 | -5.533 | <0.0001 |
| Flower diversity | 1.1057 | 0.5235 | 2.112 | 0.0347 |

| Model M4 | Coefficient | SE | z value | p-value |
| --- | --- | --- | --- | --- |
| Intercept | -3.56010 | 0.99420 | -3.581 | 0.000342 |
| Nesting sites availability | 0.02713 | 0.14891 | 0.182 | 0.855426 |

| Model M5 | Coefficient | SE | z value | p-value |
| --- | --- | --- | --- | --- |
| Intercept | -3.7640 | 0.4833 | -7.789 | <0.0001 |
| Distance to WAM | -3.4127 | 1.0560 | -3.232 | 0.0012 |

| Model M6 | Coefficient | SE | z value | p-value |
| --- | --- | --- | --- | --- |
| Intercept | -3.6086 | 0.7359 | -4.903 | 9.43e-07 |
| Flower diversity | 0.2102 | 0.6337 | 0.332 | 0.74 |

| Model M7 | Coefficient | SE | z value | p-value |
| --- | --- | --- | --- | --- |
| Intercept | -0.6980 | 0.2946 | -2.37 | 0.0178 |
| Distance to WAM | -2.3604 | 0.1900 | -12.42 | <0.0001 |

| Model M8 | Coefficient | SE | z value | p-value |
| --- | --- | --- | --- | --- |
| Intercept | --0.77239 | 0.31342 | -2.464 | 0.0137 |
| Distance to WAM | -0.69928 | 0.31959 | -2.188 | 0.0287 |
| Inside WAM : Flower div. | 0.06439 | 0.13919 | 0.463 | 0.6437 |
| Outside WAM : Flower div. | -3.23719 | 0.63698 | -5.082 | <0.0001 |

Table S1. List of plant species in fragment WAM. When plant species was present in fragment WAM, it is noted with “X”.

| Species | Family | WAM 1 | WAM 2 |  | WAM 3 | WAM 4 | WAM 5 | WAM 6 | WAM 7 | WAM 8 |
| --- | --- | --- | --- | --- | --- | --- | --- | --- | --- | --- |
| *Ammi majus L.* | *Apiaceae* | **X** |  |  |  |  |  |  |  |  |
| *Anagallis arvensis L.* | *Primulaceae* |  |  |  |  |  | **X** |  |  |  |
| *Anoda cristata (L.) Schltdl.* | *Malvaceae* |  |  |  |  |  | **X** | **X** |  |  |
| *Araujia sericifera Brot.* | *Apocynaceae* | **X** |  |  |  |  |  | **X** |  | **X** |
| *Baccharis glutinosa Pers.* | *Asteraceae* | **X** |  |  |  | **X** | **X** |  |  | **X** |
| *Bidens pilosa L.* | *Asteraceae* | **X** | **X** |  |  | **X** | **X** | **X** |  | **X** |
| *Brassica rapa L.* | *Brassicaceae* |  |  |  | **X** |  |  |  |  | **X** |
| *Capsella bursa-pastoris (L.) Medik.* | *Brassicaceae* |  |  |  |  |  | **X** |  | **X** |  |
| *Carduus acanthoides L.* | *Asteraceae* | **X** | **X** |  | **X** | **X** | **X** | **X** | **X** | **X** |
| *Centaurium pulchellum (Sw.) Druce* | *Gentinaceae* |  |  |  | **X** | **X** | **X** |  |  |  |
| *Cirsium vulgare (Savi.) Tem.* | *Asteraceae* | **X** |  |  | **X** | **X** | **X** | **X** | **X** | **X** |
| *Commelina erecta L. erecta* | *Commelinaceae* | **X** |  |  |  |  | **X** | **X** | **X** | **X** |
| *Conium maculatum* | *Apiaceae* | **X** | **X** |  | **X** | **X** | **X** | **X** | **X** | **X** |
| *Convolvulus hermanniae L.H. erasus* | *Colvolvulaceae* |  |  |  | **X** |  |  |  |  |  |
| *Conyza bonariensis (L.) Cronquist* | *Asteraceae* | **X** |  |  | **X** | **X** | **X** | **X** | **X** | **X** |
| *Cucurbita maxima Duchense (Naudin) Filov* | *Cucurbitaceae* |  |  |  |  |  |  | **X** | **X** | **X** |
| *Diplotaxis tenuifolia (L.) DC* | *Brassicaceae* |  |  |  | **X** |  |  |  |  |  |
| *Dipsacus sativus (L.) Honck* | *Dipsacaceae* | **X** |  |  | **X** |  |  |  |  |  |
| *Eclipta postrata (L.) L.* | *Asteraceae* |  |  |  |  |  | **X** |  |  |  |
| *Eryngium spp.* | *Apiaceae* |  |  |  | **X** |  |  |  |  |  |
| *Eucalytus sp.* | *Myrtaceae* |  |  |  |  |  |  |  |  | **X** |
| *Galactia marginalis Benth.* | *Fabaceae* |  |  |  | **X** |  |  |  |  |  |
| *Geoffroea spinosa Jacq.* | *Fabaceae* |  |  |  |  |  | **X** |  | **X** |  |
| *Geranium sp.* | *Geraniaceae* | **X** |  |  | **X** |  |  |  |  |  |
| *Glandularia peruviana (L.) Small* | *Verbenaceae* |  |  |  | **X** |  |  |  |  |  |
| *Hirschfeldia incana* | *Brassicaceae* | **X** | **X** |  | **X** | **X** | **X** | **X** | **X** | **X** |
| *Hypochaeris pampasica Cabrera* | *Asteraceae* |  |  |  |  |  |  |  | **X** |  |

| Species | Family | WAM 1 | WAM 2 | WAM 3 | WAM 4 | WAM 5 | WAM 6 | WAM 7 | WAM 8 |
| --- | --- | --- | --- | --- | --- | --- | --- | --- | --- |
| *Ludwigia peploides (Kunth) P.H. Raven* | *Onagraceae* |  |  |  |  | **X** |  |  |  |
| *Lythrum hyssopifolium L.* | *Lythraceae* |  |  |  |  | **X** |  |  |  |
| *Melilotus officinalis (L) Lam* | *Fabaceae* |  |  | **X** |  |  |  |  |  |
| *Oxalis conorrhiza Jacq.* | *Oxalidaceae* |  |  | **X** |  |  | **X** |  |  |
| *Physalis viscosa L.* | *Solanaceae* | **X** | **X** |  | **X** |  |  |  |  |
| *Portulaca oleracea L.* | *Portulacaceae* |  |  |  |  | **X** | **X** | **X** |  |
| *Solanum glaucophyllum Desf.* | *Solanaceae* |  |  |  | **X** |  |  |  |  |
| *Solanum nitidibaccatum Bitter* | *Solanaceae* |  |  | **X** |  |  |  |  |  |
| *Solanum pilcomayense M.* | *Solanaceae* | **X** | **X** | **X** | **X** |  | **X** | **X** |  |
| *Solanum sisymbriifolium Lam.* | *Solanaceae* |  |  |  |  |  | **X** | **X** | **X** |
| *Solidago chilensis Meyes chilensis* | *Asteraceae* | **X** |  | **X** |  |  |  |  |  |
| *Sonchus asper (L.) Hill* | *Asteraceae* | **X** |  | **X** |  | **X** | **X** | **X** | **X** |
| *Tagetes minuta L.* | *Asteraceae* | **X** | **X** |  |  | **X** | **X** |  |  |
| *Taraxacum officinale F.H. Wigg.* | *Asteraceae* |  |  |  |  |  |  | **X** |  |
| *Trifolium repens L.* | *Fabaceae* |  |  |  |  | **X** | **X** | **X** |  |
| *Turnera sidoides L. (Juss. Ex Poir.) Arbo Kausel* | *Turneraceae* |  |  | **X** |  |  |  |  |  |
| *Verbascus thapsus L.* | *Scrophulariaceae* |  |  | **X** |  |  |  |  |  |
| *Verbena bonriensis L.* | *Verbenaceae* | **X** |  | **X** | **X** |  | **X** |  |  |
| *Verbena gracilenscens (Cham.) Herter grcilensces* | *Verbenaceae* |  |  |  | **X** |  |  |  |  |
| *Viola arvensis Muray* | *Violaceae* |  |  | **X** |  |  |  |  |  |
| *Xanthium strumarium L.* | *Asteraceae* |  |  |  |  | X |  |  |  |
